# Supplementary material
Source: HighWire-hosted journal article supplement (http://www.qdcxjkg.com/highwire/filestream/113115/field_highwire_adjunct_files/0/onlinerep_revision.pdf)
Supplement: onlinerep_revision.pdf [file onlinerep_revision.pdf]

## Online repository

### **Toll-like receptors and microbial exposure: gene-gene and gene-environment interaction in the development of atopy**

Naomi E. Reijmerink

Marjan Kerkhof

Renske W.B. Bottema

Jorrit Gerritsen

Foekje F. Stelma

Carel Thijs

Constant P. van Schayck

Henriette A. Smit

Bert Brunekreef

Dirkje S. Postma

Gerard H. Koppelman

## **Multi Dimensionality Reduction (MDR)**

MDR is a method that reduces dimensionality of multifactor information and aims to improve the identification of multiple factors associated with disease, i.e. MDR reduces multifactor information into one dimension, i.e. high risk versus low risk. MDR reports the performance of (combinations of) SNPs that represent the best predictor model for each number (e.g. 2 or 3) combinations (in our case genotypes and environmental factors). The dataset is divided into a training set (9/10 of the data) and a testing set (1/10 of the data). The best predictor model is the model with the lowest prediction error in the training set. The prediction error is  $1 - \text{prediction accuracy}$ . The prediction accuracy is the accuracy of the classification of cases and controls in the testing dataset calculated as  $(\text{sensitivity} + \text{specificity})/2$ . This procedure is repeated 10 times in the dataset. Cross-validation consistency is the number of times the combination is selected as best predictor model in the 10 times the data is analysed. Missing data were imputed for missing genotypes by multiple imputations using the Multivariate Imputation by Chained Equations (Mice) procedure that runs under the statistical program R version 2.4.1. After 100 imputations, convergence was achieved resulting in 5 imputed datasets. The model with the highest cross validation consistency and lowest prediction error in the 5 imputed datasets was selected as “best model”. P-values to evaluate the significance of each model were estimated via permutation testing, in which the null-hypothesis was rejected when the one-sided p-value, as estimated by 1000 permutations in Monte Carlo simulation, was below 5%. In that case the “best model” predicts the status of cases and controls better than chance without the need to correct for multiple testing.

**Table 1**

Gene nomenclature, location, ligand and heterodimer formation.

| <b>Gene</b>            | <b>Full name</b>                        | <b>Location</b> | <b>Ligand(1)</b>                                        | <b>Forms heterodimer with <sup>1</sup></b> |
|------------------------|-----------------------------------------|-----------------|---------------------------------------------------------|--------------------------------------------|
| <b><i>TLR1</i></b>     | Toll like receptor 1                    | 4p14            | Bacteria and mycobacteria                               | TLR2                                       |
| <b><i>TLR2</i></b>     | Toll like receptor 2                    | 4q32            | Gram-positive bacteria, virus and Fungi (a.o. B-glycan) | TLR1 ,6                                    |
| <b><i>TLR3</i></b>     | Toll like receptor 3                    | 4q35            | Viruses                                                 |                                            |
| <b><i>TLR4</i></b>     | Toll like receptor 4                    | 9q32            | Gram-negative bacteria, respiratoir syncitial virus     |                                            |
| <b><i>TLR5</i></b>     | Toll like receptor 5                    | 1q41            | Bacteria                                                |                                            |
| <b><i>TLR6</i></b>     | Toll like receptor 6                    | 4p14            | Mycoplasma, gram-positive bacteria                      | TLR2                                       |
| <b><i>TLR9</i></b>     | Toll like receptor 9                    | 3p21            | Bacteria and viruses                                    |                                            |
| <b><i>TLR10</i></b>    | Toll like receptor 10                   | 4p14            | Unknown                                                 |                                            |
|                        |                                         |                 |                                                         | <b>Interacts with <sup>2-4</sup></b>       |
| <b><i>CD14</i></b>     |                                         | 5q31            | Lipopolysaccharide, viruses, poly I:C                   | TLR2, 3, 4, TLR2/6 heterodymer             |
| <b><i>MD2</i></b>      | Myeloid differentiation protein-2       | 8q21            | Forms complex with CD14 and TLR4                        | TLR4                                       |
| <b><i>LBP</i></b>      | Lipopolysaccharide Binding Protein      | 20q11           | Lipopolysaccharide                                      | TLR4                                       |
| <b><i>Dectin-1</i></b> | Dendritic cell-associated C-type lectin | 12p13           | Fungi (B-glycan)                                        | TLR2                                       |

**Table 2**

List of selected SNPs. (including Snps of special interest due to previous associations or functionality (see references) forced in as a tag SNP)

| SNP                     | Chromosomal position | Alleles | GENE           | Minor Allele frequency | Call rate (%) |
|-------------------------|----------------------|---------|----------------|------------------------|---------------|
| rs1039559               | 38831596             | T/C     | <i>TLR6</i>    | 46.3                   | 96.4          |
| rs10759931*             | 120464147            | C/T     | <i>TLR4</i>    | 43.3                   | 97.0          |
| rs10759932              | 120465144            | T/C     | <i>TLR4</i>    | 13.0                   | 96.5          |
| rs10808798              | 74906514             | T/C     | <i>MD2</i>     | 47.3                   | 97.5          |
| rs10856839              | 38777236             | A/C     | <i>TLR10</i>   | 17.5                   | 97.5          |
| rs11096956 <sup>5</sup> | 38776180             | G/T     | <i>TLR10</i>   | 20.2                   | 96.2          |
| rs11096957              | 38776491             | A/C     | <i>TLR10</i>   | 36.1                   | 97.0          |
| rs11466652              | 38776303             | A/G     | <i>TLR10</i>   | 15.1                   | 97.5          |
| rs11536878              | 120471553            | C/A     | <i>TLR4</i>    | 12.1                   | 97.0          |
| rs11536889              | 120478131            | G/C     | <i>TLR4</i>    | 13.9                   | 97.7          |
| rs11536945              | 36979832             | G/A     | <i>LBP</i>     | 24.0                   | 98.5          |
| rs11536949              | 36985885             | G/T     | <i>LBP</i>     | 07.1                   | 99.0          |
| rs11536988              | 37000937             | T/A     | <i>LBP</i>     | 04.4                   | 98.6          |
| rs11721827              | 186991137            | A/C     | <i>TLR3</i>    | 15.0                   | 98.0          |
| rs11786591              | 74916344             | C/T     | <i>MD2</i>     | 32.9                   | 96.6          |
| rs12829123              | 10273166             | A/G     | <i>DECTIN1</i> | 45.2                   | 95.5          |
| rs13126816              | 186994178            | G/A     | <i>TLR3</i>    | 23.1                   | 98.1          |
| rs16938758              | 74919749             | A/T     | <i>MD2</i>     | 18.5                   | 97.2          |
| rs17226566              | 74919912             | T/C     | <i>MD2</i>     | 23.5                   | 97.6          |
| rs1780616               | 36972942             | C/T     | <i>LBP</i>     | 33.3                   | 96.7          |
| rs187084                | 52261031             | T/C     | <i>TLR9</i>    | 42.1                   | 97.0          |
| rs1898830               | 154608453            | A/G     | <i>TLR2</i>    | 34.4                   | 96.8          |
| rs1927911               | 120470054            | C/T     | <i>TLR4</i>    | 25.5                   | 92.6          |
| rs2072493*              | 10276562             | C/T     | <i>TLR5</i>    | 14.7                   | 97.1          |
| rs2078178               | 10276562             | C/T     | <i>DECTIN1</i> | 24.7                   | 97.4          |
| rs2232596               | 36989381             | A/G     | <i>LBP</i>     | 49.9                   | 96.6          |
| rs2241096               | 223310048            | C/T     | <i>TLR5</i>    | 09.6                   | 97.6          |
| rs2563298               | 140011315            | C/A     | <i>CD14</i>    | 27.3                   | 98.3          |
| rs2569190 <sup>6</sup>  | 140012916            | G/A     | <i>CD14</i>    | 47.9                   | 97.6          |
| rs2569191 <sup>6</sup>  | 140013903            | T/C     | <i>CD14</i>    | 48.2                   | 98.3          |
| rs2770150               | 120463139            | T/C     | <i>TLR4</i>    | 26.6                   | 96.8          |
| rs2915863 <sup>6</sup>  | 140014377            | T/C     | <i>CD14</i>    | 40.5                   | 94.4          |
| rs352140 <sup>5</sup>   | 52256697             | T/C     | <i>TLR9</i>    | 44.5                   | 97.5          |
| rs3775291               | 187004074            | G/A     | <i>TLR3</i>    | 28.6                   | 97.6          |

|                          |           |     |                |      |      |
|--------------------------|-----------|-----|----------------|------|------|
| rs3775292                | 187003025 | C/G | <i>TLR3</i>    | 20.9 | 97.2 |
| rs3775296                | 186997767 | G/T | <i>TLR3</i>    | 18.7 | 96.2 |
| rs3804099 <sup>7</sup>   | 154624656 | T/C | <i>TLR2</i>    | 44.1 | 96.8 |
| rs3804100 <sup>7</sup>   | 154625409 | T/C | <i>TLR2</i>    | 6.6  | 97.9 |
| rs4129009 <sup>5</sup>   | 38774889  | A/G | <i>TLR10</i>   | 17.2 | 98.0 |
| rs4274855                | 38777471  | G/A | <i>TLR10</i>   | 17.2 | 97.5 |
| rs4696480 <sup>7</sup>   | 154607126 | T/A | <i>TLR2</i>    | 49.1 | 98.0 |
| rs4986790 <sup>7,8</sup> | 120475302 | A/G | <i>TLR4</i>    | 07.0 | 98.2 |
| rs4986791 <sup>7,8</sup> | 120475602 | C/T | <i>TLR4</i>    | 07.1 | 98.0 |
| rs5741812                | 36973999  | A/T | <i>LBP</i>     | 12.8 | 97.4 |
| rs5743557                | 38806827  | C/T | <i>TLR1</i>    | 17.6 | 97.9 |
| rs5743594                | 38802751  | C/T | <i>TLR1</i>    | 18.9 | 99.0 |
| rs5743604                | 38801285  | T/C | <i>TLR1</i>    | 23.1 | 98.3 |
| rs5743618                | 38798648  | G/T | <i>TLR1</i>    | 28.4 | 98.0 |
| rs5743788                | 38833207  | C/G | <i>TLR6</i>    | 49.1 | 98.2 |
| rs5743798                | 38832374  | C/T | <i>TLR6</i>    | 27.3 | 95.6 |
| rs5743810                | 38830350  | C/T | <i>TLR6</i>    | 40.8 | 96.7 |
| rs5743836 <sup>5</sup>   | 52260782  | T/C | <i>TLR9</i>    | 14.2 | 98.0 |
| rs5744105                | 223316077 | C/G | <i>TLR5</i>    | 49.5 | 97.1 |
| rs5744109                | 223315480 | T/C | <i>TLR5</i>    | 09.3 | 97.8 |
| rs5744157                | 223306976 | C/G | <i>TLR5</i>    | 11.8 | 98.3 |
| rs574416                 | 223285200 | C/T | <i>TLR5</i>    | 6.6  | 98.1 |
| rs5744455 <sup>6</sup>   | 140013307 | C/T | <i>CD14</i>    | 23.1 | 96.6 |
| rs6025083                | 36979787  | T/C | <i>LBP</i>     | 45.2 | 96.8 |
| rs6478317                | 120464181 | A/G | <i>TLR4</i>    | 34.8 | 98.3 |
| rs6531666                | 38832168  | T/C | <i>TLR6</i>    | 31.6 | 91.3 |
| rs745144                 | 37005536  | C/T | <i>LBP</i>     | 43.2 | 97.6 |
| rs7657186                | 186994039 | G/A | <i>TLR3</i>    | 21.3 | 96.7 |
| rs7668666                | 187001292 | C/A | <i>TLR3</i>    | 26.3 | 96.7 |
| rs7838114                | 74935611  | G/A | <i>MD2</i>     | 19.2 | 97.6 |
| rs7959451                | 10271055  | C/T | <i>DECTIN1</i> | 14.7 | 96.3 |

\*SNPs did not pass Hardy Weinberg equilibrium

**Table 3**

Single SNP analysis.

Odds ratios and 95% CI are shown (only significant ( $p \leq 0.05$ ) SNPs are shown)

| Gene         | Rs number  | Total IgE<br>1-2 yrs | Total IgE<br>6-8 yrs | Specific<br>IgE Indoor<br>Allergens<br>6-8 yrs |
|--------------|------------|----------------------|----------------------|------------------------------------------------|
| <i>CD14</i>  | rs2569190  |                      | 1.5 (1.0-2.3) R      |                                                |
| <i>LBP</i>   | rs745144   |                      | 1.6 (1.1-2.3) D      |                                                |
| <i>LY96</i>  | rs7838114  | 0.4 (0.2-0.9) R      |                      |                                                |
| <i>LY96</i>  | rs10808798 | 0.7 (0.6-1.0) D      |                      |                                                |
| <i>TLR1</i>  | rs5743594  |                      |                      | 3.9(2.0-8.1) R                                 |
| <i>TLR1</i>  | rs5743618  |                      |                      | 0.5(0.3-1.0) R                                 |
| <i>TLR1</i>  | rs5743604  |                      |                      | 0.6(0.5-0.9) D                                 |
| <i>TLR2</i>  | rs1898830  |                      | 1.4(1.0-2.0) D       |                                                |
| <i>TLR2</i>  | rs4696480  |                      | 0.6(0.4-0.9) R       |                                                |
| <i>TLR3</i>  | rs3775296  |                      | 0.7(0.5-1.0) D       |                                                |
| <i>TLR3</i>  | rs7657186  | 1.4(1.1-1.8) H       |                      |                                                |
| <i>TLR4</i>  | rs2770150  |                      | 2.0 (1.1-3.8) R      |                                                |
| <i>TLR4</i>  | rs6478317  |                      |                      |                                                |
| <i>TLR4</i>  | rs1927911  |                      | 0.7(0.5-0.0) D       |                                                |
| <i>TLR6</i>  | rs5743810  |                      |                      | 1.8(1.2-2.7) R                                 |
| <i>TLR6</i>  | rs1039559  | 0.7(0.5-0.9) H       |                      |                                                |
| <i>TLR6</i>  | rs5743798  |                      |                      | 1.4(1.0-1.9) D                                 |
| <i>TLR6</i>  | rs6531666  | 1.5(1.0-2.2) R       |                      |                                                |
| <i>TLR10</i> | rs4274855  |                      |                      | 0.3(0.1-0.9) R                                 |
| <i>TLR10</i> | rs10856839 | 2.0(1.0-2.9) R       |                      |                                                |
| <i>TLR10</i> | rs11466652 | 2.3(1.0-5.1) R       |                      |                                                |
| <i>TLR10</i> | rs11096956 |                      |                      | 0.4(0.1-0.9) R                                 |
| <i>TLR10</i> | rs4129009  |                      |                      | 0.2(0.1-0.8) R                                 |
| <i>TLR10</i> | rs11096957 |                      |                      | 0.7(0.5-0.9) D                                 |

D:Dominant model, R:Recessive model; H:Heterozygote compared to minor allele.

There is overlapping data in this table with the article "TLR-related pathway analysis: novel gene-gene interactions in the development of asthma and atopy" Reijmerink NE, Bottema RW, Kerkhof M Allergy. 2010 Feb;65(2):199-207

## Reference List

- 1 Ishii KJ, Coban C, Akira S. Manifold mechanisms of toll-like receptor-ligand recognition. *J Clin Immunol* 2005 Nov;25(6):511-21
- 2 Akashi S, Saitoh S, Wakabayashi Y, Kikuchi T, Takamura N, Nagai Y et al. Lipopolysaccharide interaction with cell surface Toll-like receptor 4-MD-2: higher affinity than that with MD-2 or CD14. *J Exp Med* 2003 Oct 6;198(7):1035-42
- 3 Akira S, Takeda K. Toll-like receptor signalling. *Nat Rev Immunol* 2004 Jul;4(7):499-511
- 4 Goodridge HS, Underhill DM. Fungal Recognition by TLR2 and Dectin-1. *Handb Exp Pharmacol* 2008;(183):87-109
- 5 Lazarus R, Raby BA, Lange C Silverman EK, Kwiatkowski DJ, Vercelli D et al. TOLL-like receptor 10 genetic variation is associated with asthma in two independent samples. *Am J Respir Crit Care Med*. 2004 Sep 15;170(6):594-600
- 6 Vercelli D, Baldini M, Martinez F. The monocyte/IgE connection: may polymorphisms in the CD14 gene teach us about IgE regulation? In *Arch Allergy Immunol*. 2001 Jan-Mar;124(1-3):20-4
- 7 Eder W, Klimecki W, Yu L, von Mutius E, Riedler J, Braun-Fahrlander C, Nowak D et al. Toll-like receptor 2 as a major gene for asthma in children of European farmers. *J Allergy Clin Immunol*. 2004 Mar;113(3):482-8
- 8 Werner M, Topp R, Wimmer K, Richter K, Bischof W, Wjst M, Heinrich J. TLR4 gene variants modify endotoxin effects on asthma. *J Allergy Clin Immunol*. 2003 Aug;112(2):323-30
- 9 Hawn TR, Verbon A, Lettinga KD. A common dominant TLR5 stop codon polymorphism abolishes flagellin signaling and is associated with susceptibility to legionnaires' disease. *Exp Med*. 2003 Nov 17;198(10):1563-72
